# Supplementary material for: Beninese children with cerebral malaria do not develop humoral immunity against the IT4-VAR19-DC8 PfEMP1 variant linked to EPCR and brain endothelial binding
Source: Springer Nature journal article supplement (doi:10.1186/s12936-015-1008-5), 2015-12-01
Supplement: MOESM1 [file 9761882]

## Additional file 1

Antibody titers (IgG)

| Rabbit | Day 0 | Day 49  | Day 63  |
|--------|-------|---------|---------|
| 1      | < 50  | 787,000 | 558,000 |
| 2      | < 50  | 809,000 | 756,000 |
