# Supplementary material for: Beninese children with cerebral malaria do not develop humoral immunity against the IT4-VAR19-DC8 PfEMP1 variant linked to EPCR and brain endothelial binding
Source: Springer Nature journal article supplement (doi:10.1186/s12936-015-1008-5), 2015-12-01
Supplement: MOESM2 [file 12936_2015_1008_MOESM2_ESM.pdf]

## Supplementary Table 1

Antibodies raised against VAR19-NTS-DBLy6 inhibit its interaction with EPCR

| Rabbit | Day 0 | Day 49  | Day 63  |
|--------|-------|---------|---------|
| 1      | < 50  | 787,000 | 558,000 |
| 2      | < 50  | 809,000 | 756,000 |
