# Supplementary material for: Beninese children with cerebral malaria do not develop humoral immunity against the IT4-VAR19-DC8 PfEMP1 variant linked to EPCR and brain endothelial binding
Source: Springer Nature journal article supplement (doi:10.1186/s12936-015-1008-5), 2015-12-01

# Supplementary Figure 2

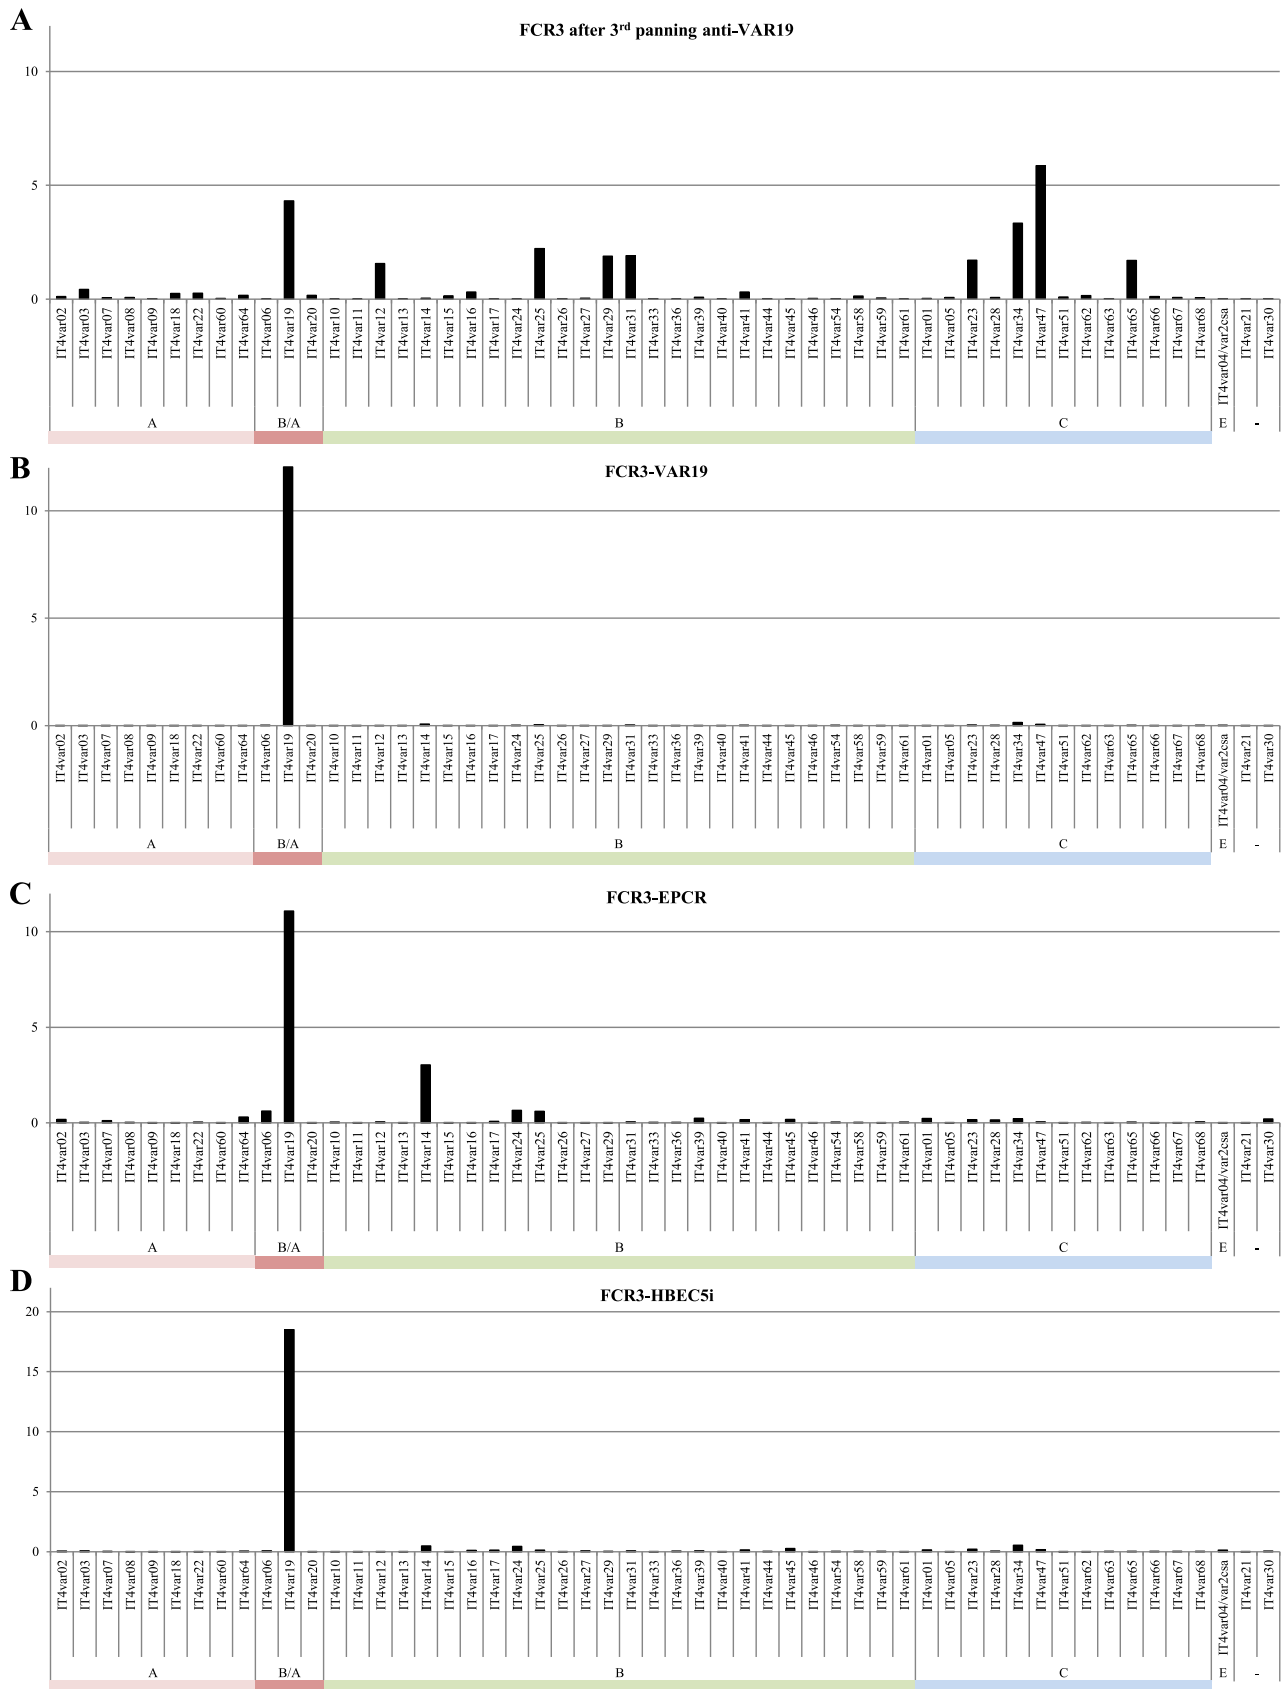

Supplement: MOESM3 [file 9761882]
